# Supplementary material
Source: Springer Nature journal article supplement (https://www.springermedizin.de/resource/supplementary/12875_2013_1192_MOESM4_ESM.pdf/9435566)

# Absolute risk for a chronic disease in male at onset of IA

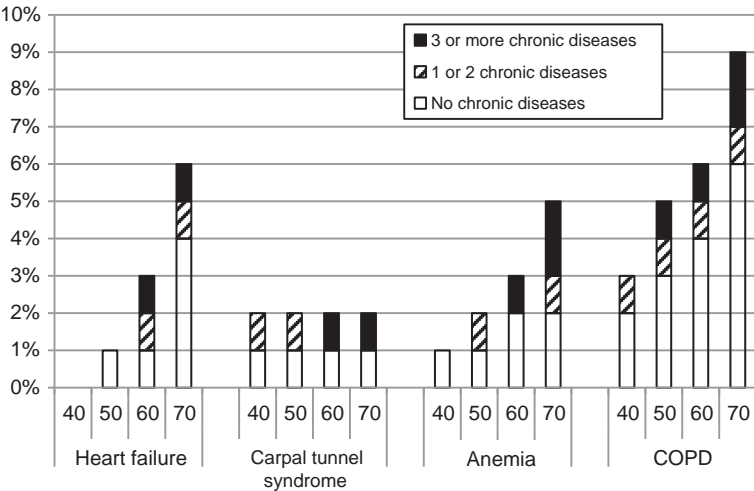

Supplement: MOESM4 [file 9435566]
